# Supplementary material for: A simple approach to achieve a metastable metal oxide derived from carbonized metal–organic gels
Source: Royal Society of Chemistry journal article supplement (doi:10.1039/c9cc00240e), 2019-01-01
Supplement: c9cc00240e1.pdf [file c9cc00240e1.pdf]

## Electronic supplementary information

### A Simple Approach In Achieving A Metastable Metal Oxide Derived from Carbonized Metal-Organic Gels

Jing-Cheng Huang<sup>a</sup>, Yung-Han Shih<sup>a</sup>, Stephen Lirio<sup>a</sup>, Shiuan-Yau Wu<sup>a</sup>, Hsin-Tsung Chen<sup>a</sup>,  
Wan-Ling Liu<sup>a,b\*</sup>, Chia-Her Lin<sup>a,c\*</sup> and Hsi-Ya Huang<sup>a,†</sup>

<sup>a</sup> Department of Chemistry, Chung Yuan Christian University, 200 Chung Pei Rd., Chungli District, Taoyuan City, 320, Taiwan. E-mail: [chiaher@cycu.edu.tw](mailto:chiaher@cycu.edu.tw)

<sup>b</sup> College of Science, Chung Yuan Christian University, 200 Chung Pei Road, Chung Li District, Taoyuan City, 320, Taiwan. E-mail: [wendyliu@cycu.edu.tw](mailto:wendyliu@cycu.edu.tw)

<sup>c</sup> R&D Center for Membrane Technology Chung Yuan Christian University, 200 Chung Pei Road, Chung-Li District, Taoyuan City, 320, Taiwan

<sup>†</sup> Deceased August 22, 2017

## Experimental Section

### Materials

The dopamine hydrochloride (Da), D/L-norepinephrine hydrochloride (Ne), (-)- epinephrine (E), palmitate acid, methyl linoleate (internal standard), methyl palmitate and amino acids (arginine (Arg), histidine (His), lysine (Lys), aspartate (Asp), glutamate (Glu)) were purchased from Sigma-Aldrich. Zirconium tetrachloride nonhydrate ( $\text{ZrCl}_4$ ) was purchased from Alfa Aesar. The 1,4-benzenedicarboxylic acid ( $\text{H}_2\text{BDC}$ ) was purchased from Showa Chemical Co., Ltd while N,N-Dimethylformamide (DMF, >99%) was purchased from Honeywell Research Chemicals. The ethanol (EtOH, 95 %) was purchased from ECHO chemicals.

### Apparatus

The MOG synthesis was carried out in a reaction using Circulator Oven (DK-30NP2, YOTEC) and calcined in tubular furnaces (OT-T060, Olink). X-ray diffractometer (Bruker D8 Advance ECO, Bruker Daltonics) was used for characterizing the materials. A scanning electron microscope (JSM-7600F, JEOL) was used to verify the morphology of the synthesized MOGs. Raman spectrometer (Triax 320, Jobin Yvon) was used to evaluate the degree of graphitization of nanoporous carbon materials (NPCs). X-ray photoelectron spectroscopy (XPS, VG Scientific ESCALAB 250, UK) from National Taiwan University was utilized for surface determination of NPCs. An autoflex Speed MALDI-TOF mass spectrometer (Bruker Daltonics, Germany) was used for the determination of analytes using 355 nm Nd:YAG-laser at 100 Hz. The biodiesel product was determined by GC-FID (GC-7890, Agilent).

### **Preparation of Zr-MOG**

The zirconium MOG was synthesized according to the previous literature.<sup>S1</sup> Typically, a mixture of zirconium tetrachloride nonahydrate ( $\text{ZrCl}_4$ , 0.0466 g, 0.2 mmol), 1,4-benzenedicarboxylic acid ( $\text{C}_6\text{H}_4$ -1,4- $(\text{CO}_2\text{H})_2$ ,  $\text{H}_2\text{BDC}$ , 0.0332 g, 0.2 mmol), dimethylformamide (DMF, 0.5 mL) and ethanol ( $\text{EtOH}$ , 0.5 mL) in a 23 mL Teflon autoclave. The mixture was heated at 80 °C then kept for 4.5 h. After cooling to room temperature, the white gel were obtained and activated in ethanol then dried overnight at 80 °C.

### **Preparation of carbonized MOGs**

The MOG powders (0.2 g) were placed in a ceramic boat then transferred in the tube furnace. The furnace was heated from room temperature to 600, 700, 800 and 900 °C (hereafter denoted as  $\text{ZrO}_2\text{-NPC-X}$  in which  $X = \text{temperature}$ ) at heating rate of 5 °C  $\text{min}^{-1}$  under  $\text{N}_{2(\text{g})}$  condition. After reaching the specified temperature, it was kept for 5 h and then cool down to room temperature at rate of 1 °C  $\text{min}^{-1}$ .

### **Sample preparation for LDI process**

A 100 mg  $\text{L}^{-1}$  stock solution containing Da, E and Ne were dissolved in deionized water (D.I. water) followed by ultrasonication in ice bath for 10 mins and stored at 4 °C prior to use. In a separate container, a 2000 mg  $\text{L}^{-1}$  matrix solution containing Zr-MOGs or  $\text{ZrO}_2\text{-NPC}$  was suspended in 100  $\mu\text{L}$   $\text{EtOH}/\text{H}_2\text{O}$  (v/v, 1:1). For LDI assay, 1  $\mu\text{L}$  matrix solution was placed onto the target plate and allowed to dry at room temperature. Thereafter, 1  $\mu\text{L}$  sample solution was deposited onto the matrix surface and dried at room temperature.

### **Esterification reaction of free fatty acid (FFA)**

A 0.22 mmol (56 mg) of palmitate was dissolved in 0.8 mL methanol (molar ratio is 1 : 90), and added with 18 wt% (10 mg) ZrO<sub>2</sub>-NPC-800, as catalyst, in a batch reactor. The reaction temperature was set at 68 °C for 24h. After reaction, the mixture was centrifuged and collected biodiesel products (*i.e.*, supernatant). The products were diluted to 100 mg L<sup>-1</sup> and analyzed by GC-FID. The recyclability of the catalyst was carried out by washing it with methanol and dried for next catalytic cycle.

### **Computational Methods**

All structure optimizations have been carried out with DFT plane-wave calculations as implemented in the Vienna Ab initio Simulation Program (VASP). A cutoff energy of 450 eV was set for a plane-wave basis. The Brillouin zone was sampled with (3 × 3 × 1) k-point mesh for surface calculations. The (-111) and (101) surfaces with a vacuum space of 15 Å were modeled for monoclinic ZrO<sub>2</sub> and tetragonal ZrO<sub>2</sub>, respectively.

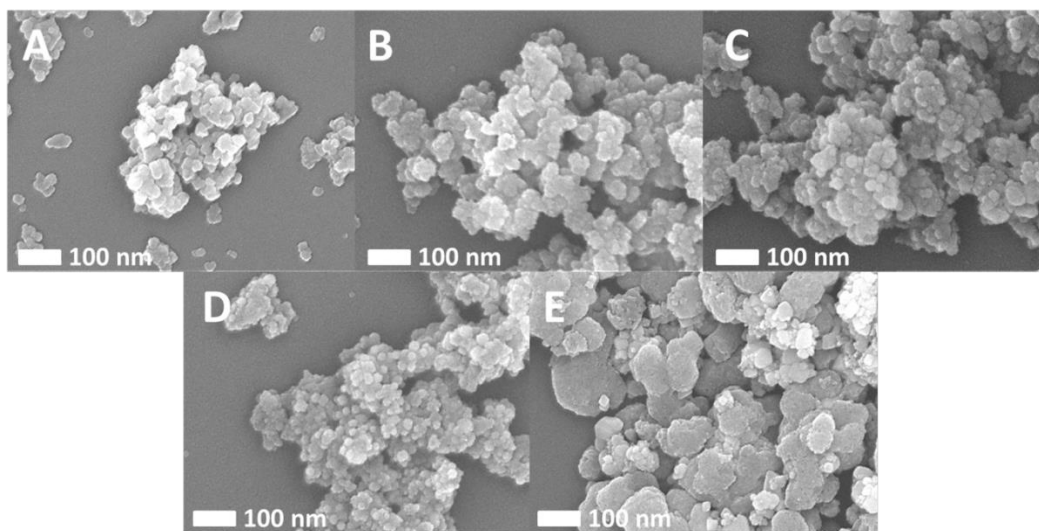

**Fig S1.** SEM images A) Zr-MOG, B) ZrO<sub>2</sub>-NPC-600, C) ZrO<sub>2</sub>-NPC-700, D) ZrO<sub>2</sub>-NPC-800, and E) ZrO<sub>2</sub>-NPC-900.

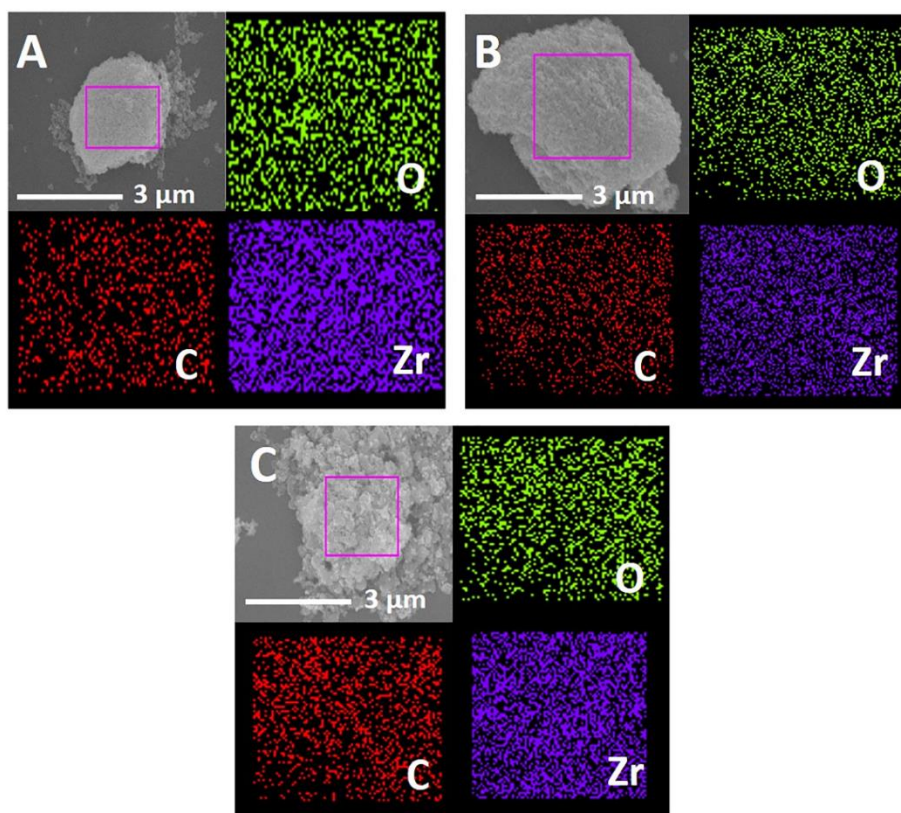

**Fig S2.** SEM-EDS micrographs of A) ZrO<sub>2</sub>-NPC-600, B) ZrO<sub>2</sub>-NPC-700 and C) ZrO<sub>2</sub>-NPC-900.

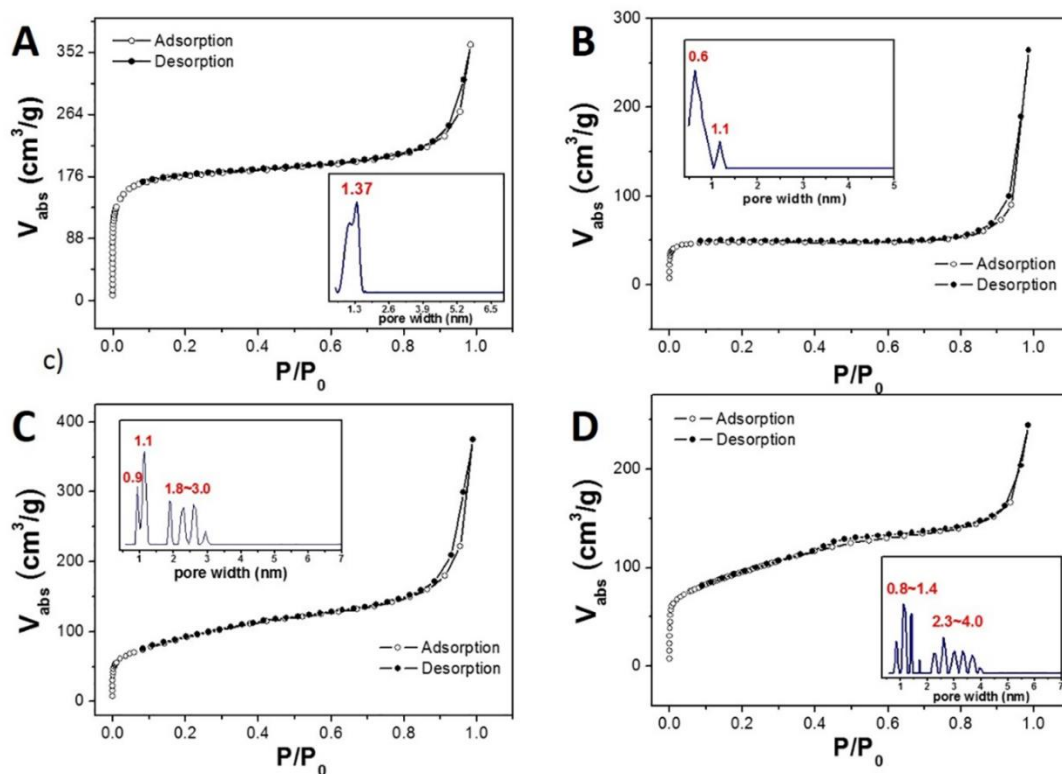

**Fig S3.** N<sub>2</sub> sorption isotherms and pore size distribution of A) Zr-MOG, B) ZrO<sub>2</sub>-NPC-600, C) ZrO<sub>2</sub>-NPC-700 and D) ZrO<sub>2</sub>-NPC-900.

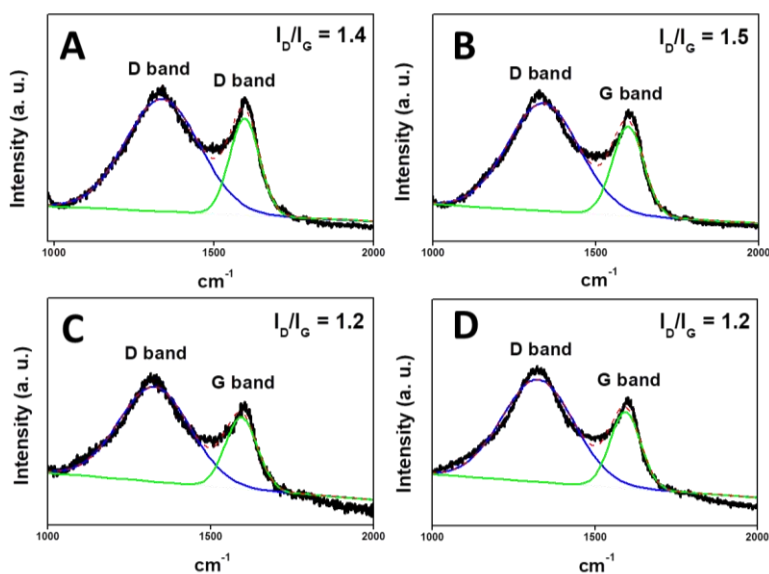

**Fig S4.** Curve fitting of Raman spectrums for ZrO<sub>2</sub>-NPC carbonized at A) 600 °C, B) 700 °C, C) 800 °C and D) 900 °C. The I<sub>D</sub>/I<sub>G</sub> ratio are calculated via peak intensity after curve fitting.

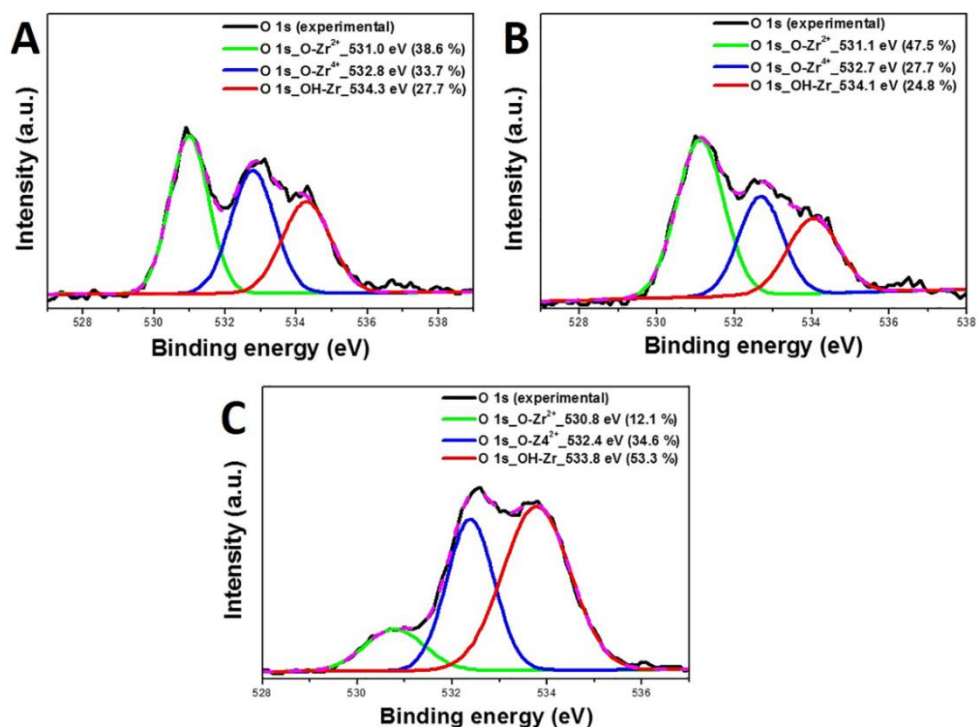

**Fig S5.** XPS spectras were obtained from curved fitting of O 1s A) ZrO<sub>2</sub>-NPC-600, B) ZrO<sub>2</sub>-NPC-700, and C) ZrO<sub>2</sub>-NPC-900.

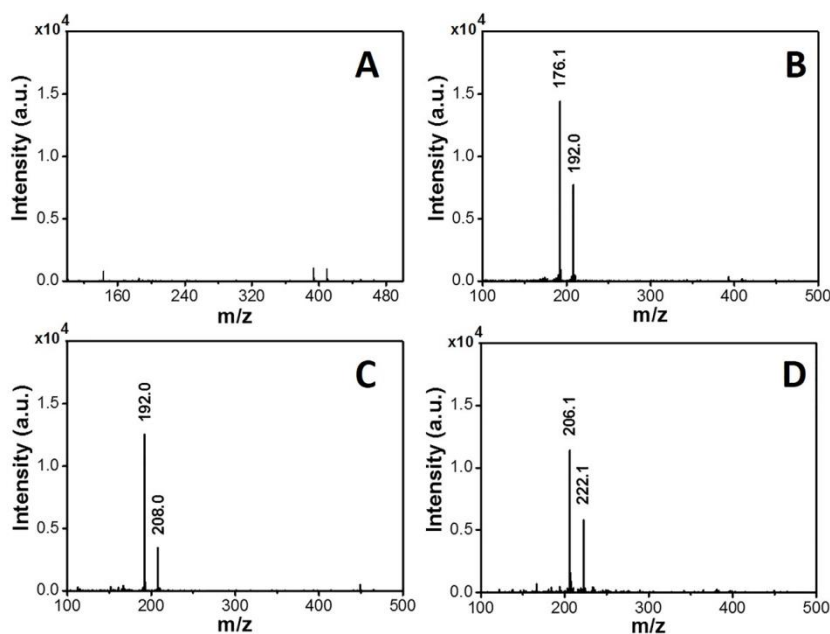

**Fig S6.** SALDI-MS spectras of A) blank, B) Da ([M+Na]<sup>+</sup>, m/z 176.1; [M+K]<sup>+</sup>, m/z 192.0), C) Ne ([M+Na]<sup>+</sup>, m/z 192.0; [M+K]<sup>+</sup>, m/z 208.0), D) E ([M+Na]<sup>+</sup>, m/z 206.1; [M+K]<sup>+</sup>, m/z 222.1). Matrix: ZrO<sub>2</sub>-NPC-600. Detection: *Positive ion mode*. Laser conditions: 30 %, 500 shots. N=10

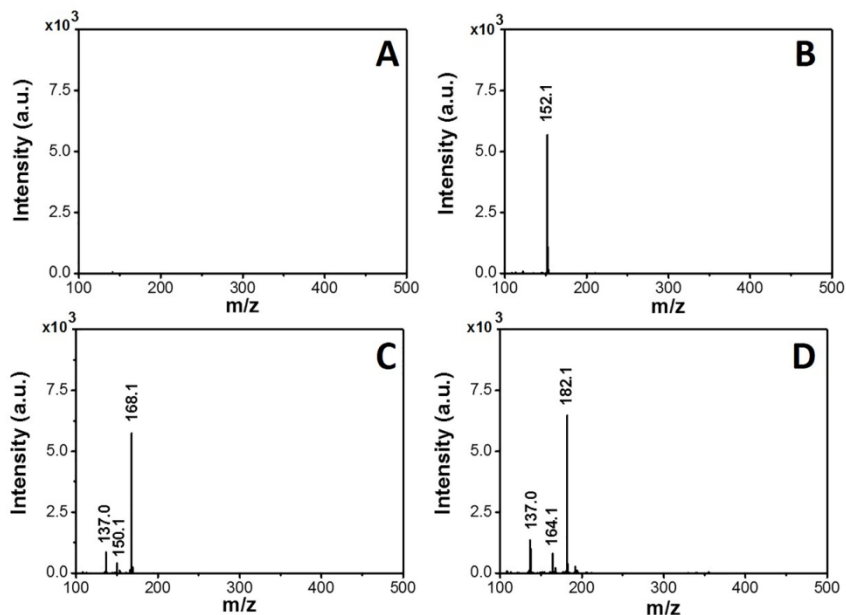

**Fig S7.** SALDI-MS spectras of A) blank, B) Da ( $[M-H]^-$ ,  $m/z$  152.1), C) Ne ( $[M-H]^-$ ,  $m/z$  168.1;  $[M-H_2O-H]^-$ ,  $m/z$  150.1;  $[M-CH_2NH_2-H]^-$ ,  $m/z$  137.0), D) E ( $[M-H]^-$ ,  $m/z$  182.1;  $[M-CH_3CH_2NH_2-H]^-$ ,  $m/z$  137.0). Matrix:  $ZrO_2$ -NPC-600. Detection: *Negative ion mode*. Laser conditions: 30 %, 500 shots. N=10

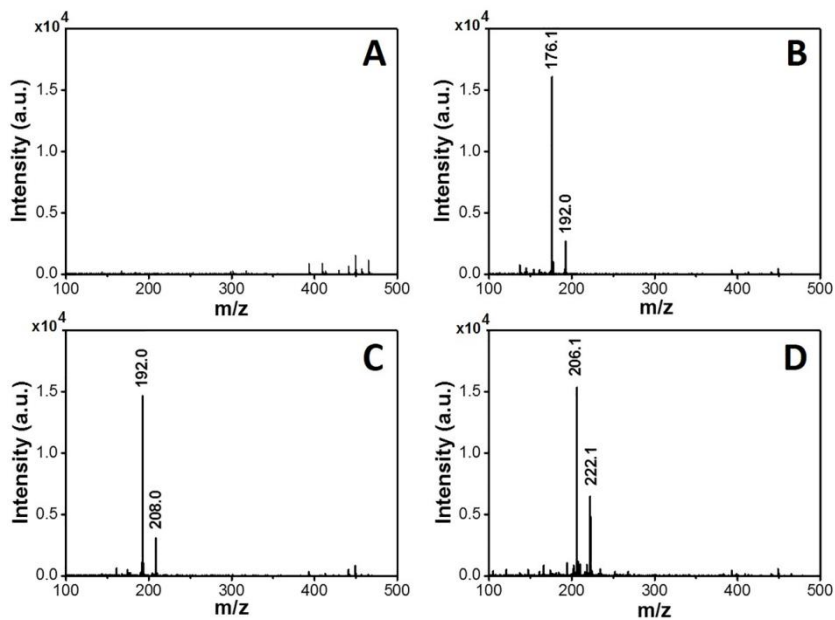

**Fig S8.** SALDI-MS spectras of A) blank, B) Da ( $[M+Na]^+$ ,  $m/z$  176.1;  $[M+K]^+$ ,  $m/z$  192.0), C) Ne ( $[M+Na]^+$ ,  $m/z$  192.0;  $[M+K]^+$ ,  $m/z$  208.0), D) E ( $[M+Na]^+$ ,  $m/z$  206.1;  $[M+K]^+$ ,  $m/z$  222.1). Matrix:  $ZrO_2$ -NPC-700. Detection: *Positive ion mode*. Laser conditions: 30 %, 500 shots. N=10

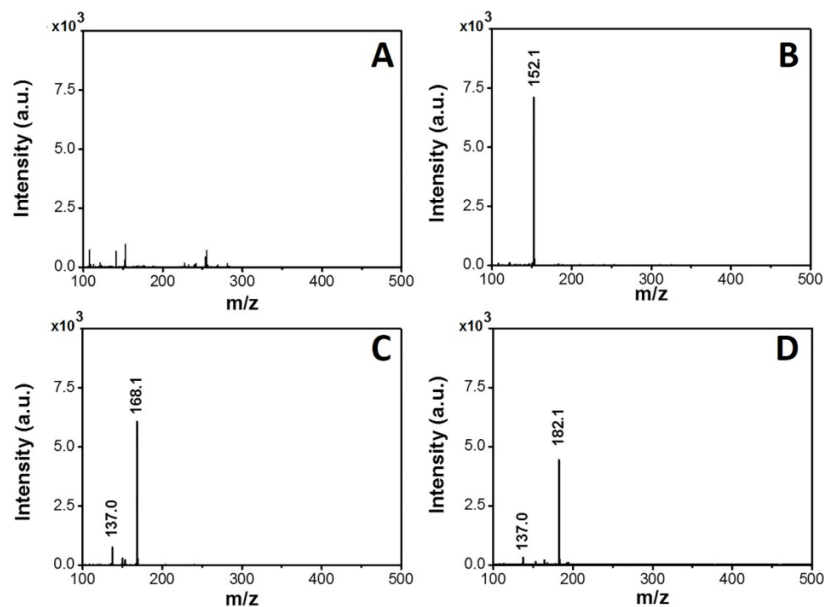

**Fig S9.** SALDI-MS spectras of A) blank, B) Da ( $[M-H]^-$ ,  $m/z$  152.1), C) Ne ( $[M-H]^-$ ,  $m/z$  168.1;  $[M-H_2O-H]^-$ ,  $m/z$  150.1;  $[M-CH_2NH_2-H]^-$ ,  $m/z$  137.0), D) E ( $[M-H]^-$ ,  $m/z$  182.1;  $[M-CH_3CH_2NH_2-H]^-$ ,  $m/z$  137.0). Matrix:  $ZrO_2$ -NPC-700. Detection: *Negative ion mode*. Laser conditions: 30 %, 500 shots. N=10

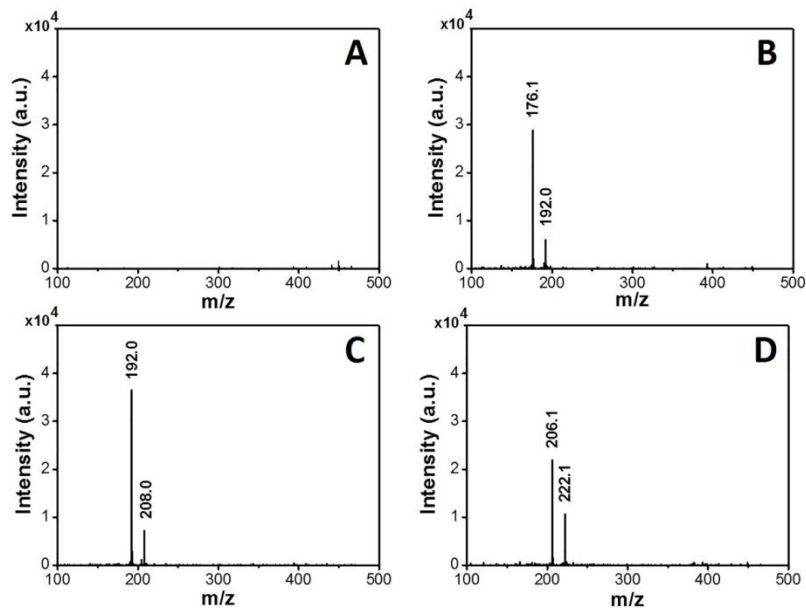

**Fig S10.** SALDI-MS spectras of A) blank, B) Da ( $[M+Na]^+$ ,  $m/z$  176.1;  $[M+K]^+$ ,  $m/z$  192.0), C) Ne ( $[M+Na]^+$ ,  $m/z$  192.0;  $[M+K]^+$ ,  $m/z$  208.0), D) E ( $[M+Na]^+$ ,  $m/z$  206.1;  $[M+K]^+$ ,  $m/z$  222.1). Matrix:  $ZrO_2$ -NPC-800°C. Detection: *Positive ion mode*. Laser conditions: 30 %, 500 shots. N=10

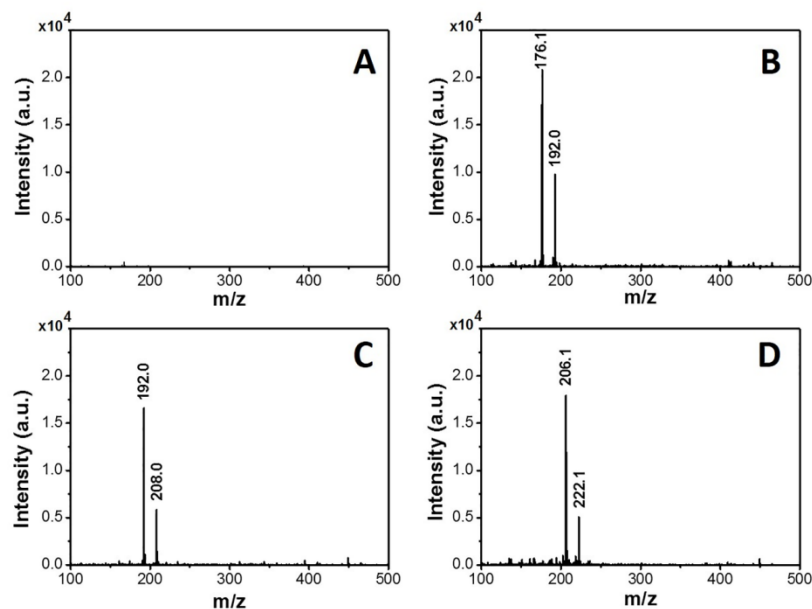

**Fig S11.** SALDI-MS spectras of A) blank, B) Da ( $[M+Na]^+$ ,  $m/z$  176.1;  $[M+K]^+$ ,  $m/z$  192.0), D) Ne ( $[M+Na]^+$ ,  $m/z$  192.0;  $[M+K]^+$ ,  $m/z$  208.0), E) E ( $[M+Na]^+$ ,  $m/z$  206.1;  $[M+K]^+$ ,  $m/z$  222.1). Matrix:  $ZrO_2$ -NPC-900°C. Detection: *Positive ion mode*. Laser conditions: 30 %, 500 shots. N=10

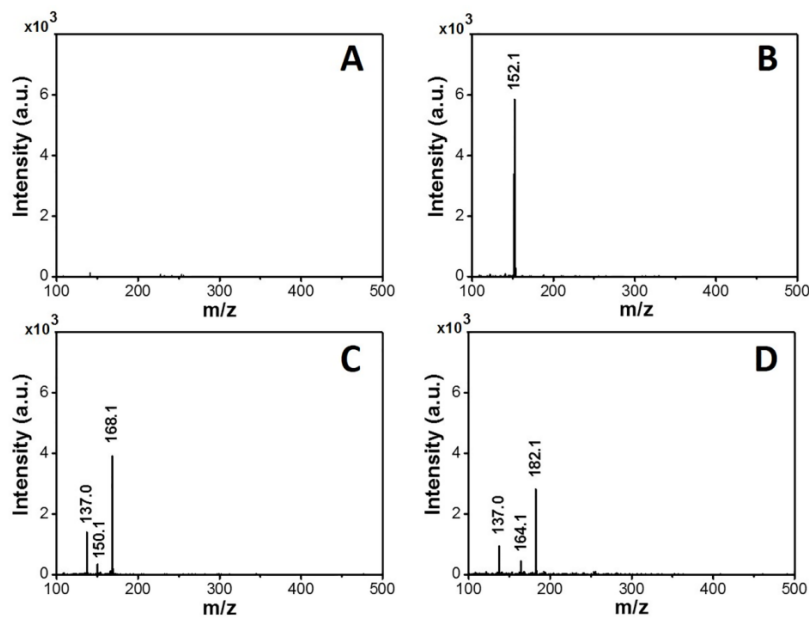

**Fig S12.** SALDI-MS spectras of A) blank, B) Da ( $[M-H]^-$ ,  $m/z$  152.1), C) Ne ( $[M-H]^-$ ,  $m/z$  168.1;  $[M-H_2O-H]^-$ ,  $m/z$  150.1;  $[M-CH_2NH_2-H]^-$ ,  $m/z$  137.0), D) E ( $[M-H]^-$ ,  $m/z$  182.1;  $[M-H_2O-H]^-$ ,  $m/z$  164.1;  $[M-CH_3CH_2NH_2-H]^-$ ,  $m/z$  137.0). Matrix:  $ZrO_2$ -NPC-900°C. Detection: *Negative ion mode*. Laser conditions: 30 %, 500 shots. N=10

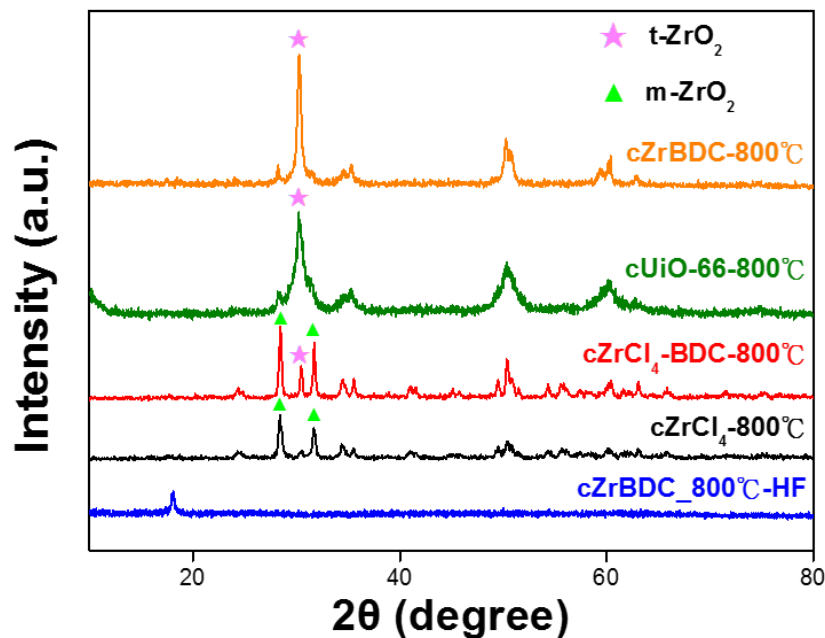

**Fig. S13** PXRD patterns of the precursor of MOGs and cZrBDC-800 °C with 10%HF.

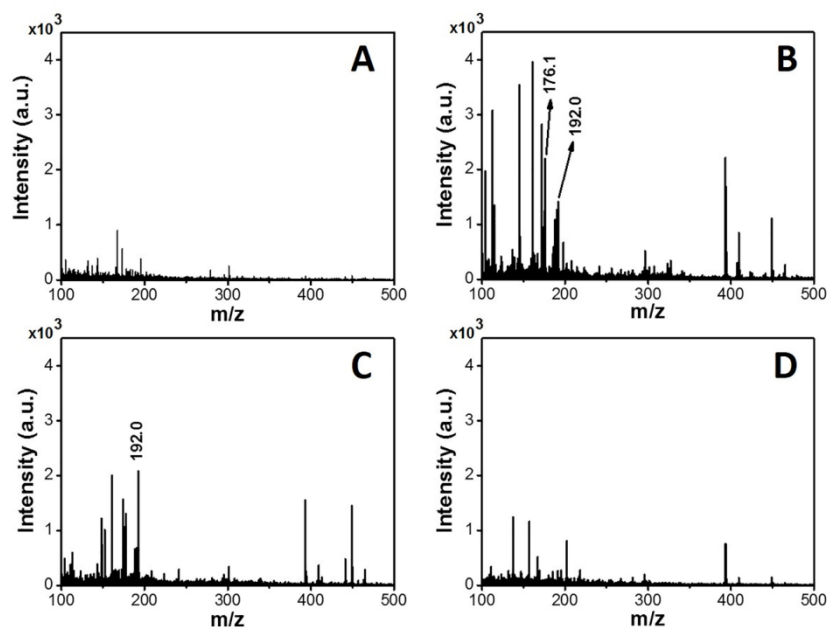

**Fig. S14.** SALDI-MS spectras of A) blank, B) Da ( $[M+Na]^+$ ,  $m/z$  176.1;  $[M+K]^+$ ,  $m/z$  192.0), D) Ne ( $[M+Na]^+$ ,  $m/z$  192.0), E) E (not detected). Matrix:  $ZrO_2$ -NPC-800 pretreated with 10 % HF. Detection: *Positive ion mode*. Laser conditions: 30 %, 500 shots. N=10

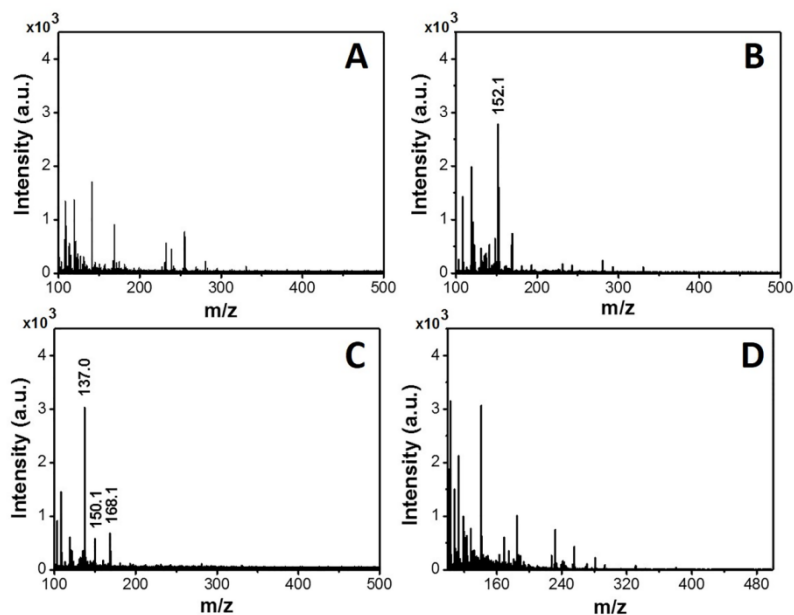

**Fig. S15.** SALDI-MS spectras of A) blank, B) Da ( $[M-H]^-$ ,  $m/z$  152.1), C) Ne ( $[M-H]^-$ ,  $m/z$  168.1;  $[M-H_2O-H]^-$ ,  $m/z$  150.1;  $[M-CH_2NH_2-H]^-$ ,  $m/z$  137.0), D) E (not detected). Matrix:  $ZrO_2$ -NPC-800 pretreated with 10 % HF. Detection: *Negative mode*. Laser conditions: 30 %, 500 shots. N=10

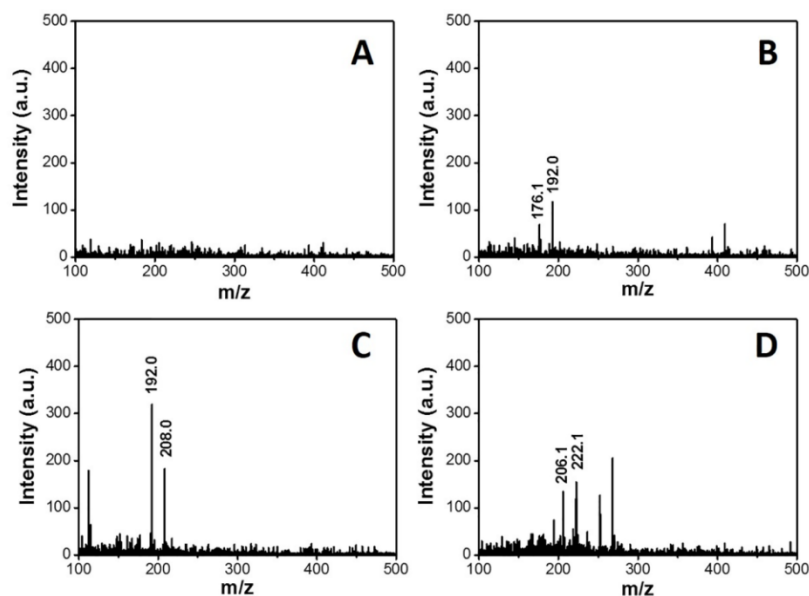

**Fig S16.** SALDI-MS spectras of A) blank, B) Da ( $[M+Na]^+$ ,  $m/z$  176.1;  $[M+K]^+$ ,  $m/z$  192.0), C) Ne ( $[M+Na]^+$ ,  $m/z$  192.0;  $[M+K]^+$ ,  $m/z$  208.0), D) E ( $[M+Na]^+$ ,  $m/z$  206.1;  $[M+K]^+$ ,  $m/z$  222.1). Matrix:  $cZrCl_4$ -BDC-800. Detection: *Positive ion mode*. Laser conditions: 30 %, 500 shots. N=10

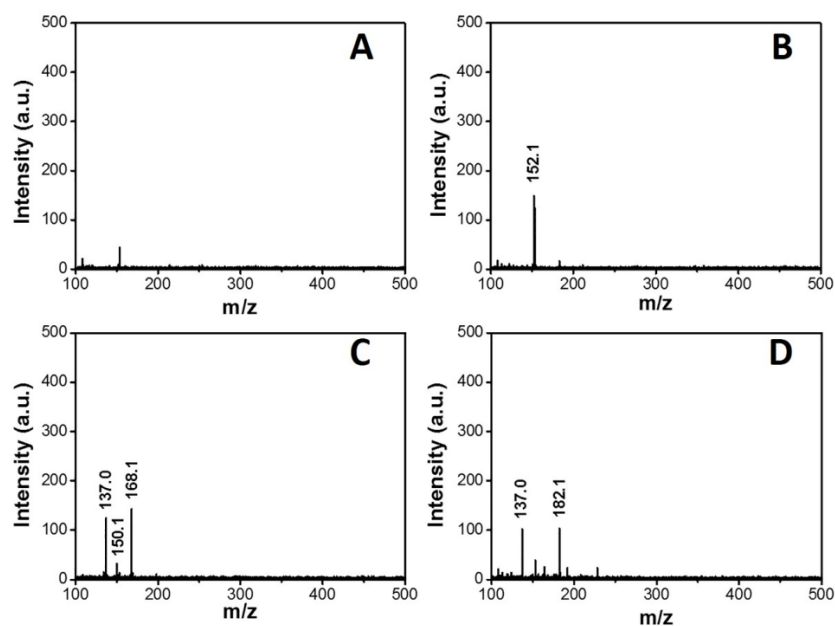

**Fig S17.** SALDI-MS spectras of A) blank, B) Da ( $[M-H]^-$ , m/z 152.1), C) Ne ( $[M-H]^-$ , m/z 168.1;  $[M-H_2O-H]^-$ , m/z 150.1;  $[M-CH_2NH_2-H]^-$ , m/z 137.0), D) E ( $[M-H]^-$ , m/z 182.1;  $[M-CH_3CH_2NH_2-H]^-$ , m/z 137.0). Matrix: cZrCl<sub>4</sub>-BDC-800. Detection: *Negative ion mode*. Laser conditions: 30 %, 500 shots. N=10

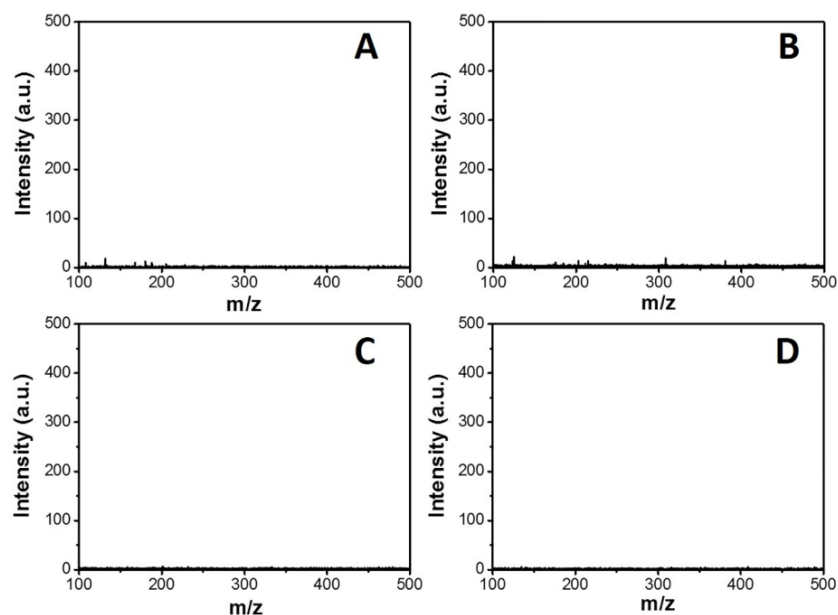

**Fig S18.** SALDI-MS spectras of A) blank and B) 100 ppm catecholamines detected at *positive ion mode*; C) blank and D) 100 ppm catecholamines detected at *negative ion mode*. Matrix: cZrCl<sub>4</sub>-800. Laser conditions: 30 %, 500 shots. Catecholamines contained: Da, Ne and E. N=10

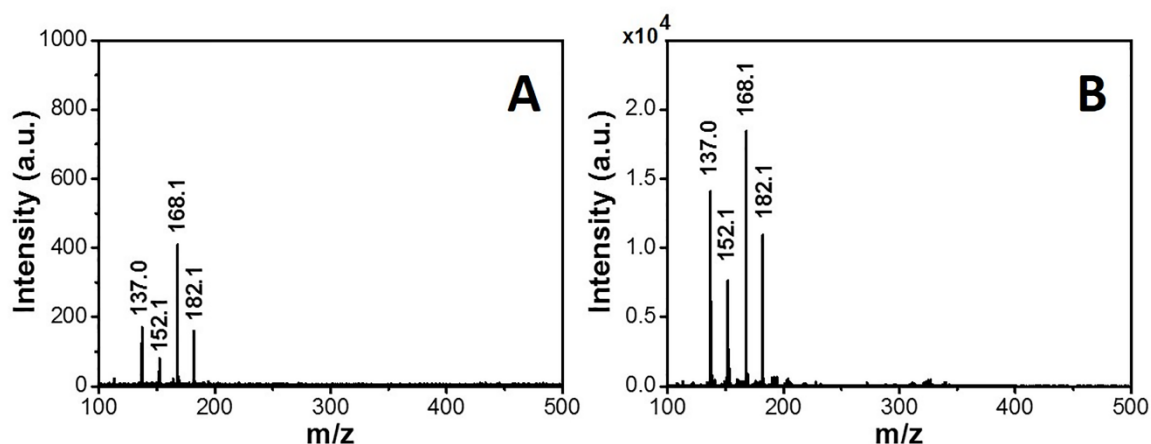

**Fig S19.** Comparison of SALDI-MS spectras of A) cUiO-66-800 and B) ZrO<sub>2</sub>-NPC-800 as matrix. Da ([M-H]<sup>-</sup>, m/z 152.1), Ne ([M-H]<sup>-</sup>, m/z 168.1; [M-H<sub>2</sub>O-H]<sup>-</sup>, m/z 150.1; [M-CH<sub>2</sub>NH<sub>2</sub>-H]<sup>-</sup>, m/z 137.0), E ([M-H]<sup>-</sup>, m/z 182.1; [M-CH<sub>3</sub>CH<sub>2</sub>NH<sub>2</sub>-H]<sup>-</sup>, m/z 137.0). Detection: *Negative ion mode*. Laser conditions: 30 %, 500 shots. N=10

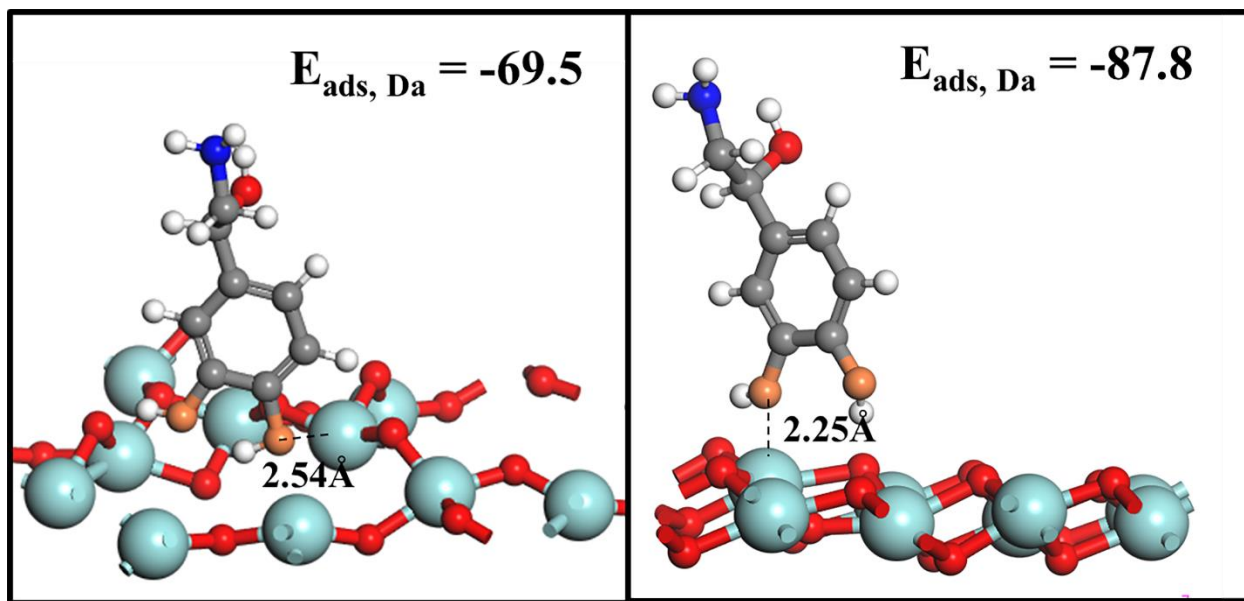

**Fig S20.** DFT calculated adsorption sites for Da in *m*-ZrO<sub>2</sub> (left) and *t*-ZrO<sub>2</sub> (right). Adsorption energies ( $E_{\text{ads}}$ ) are in kJ mol<sup>-1</sup>. The atoms are shown as follows: Zr-green, H-white, O-red, C-gray, N-blue, O in catechol-orange.

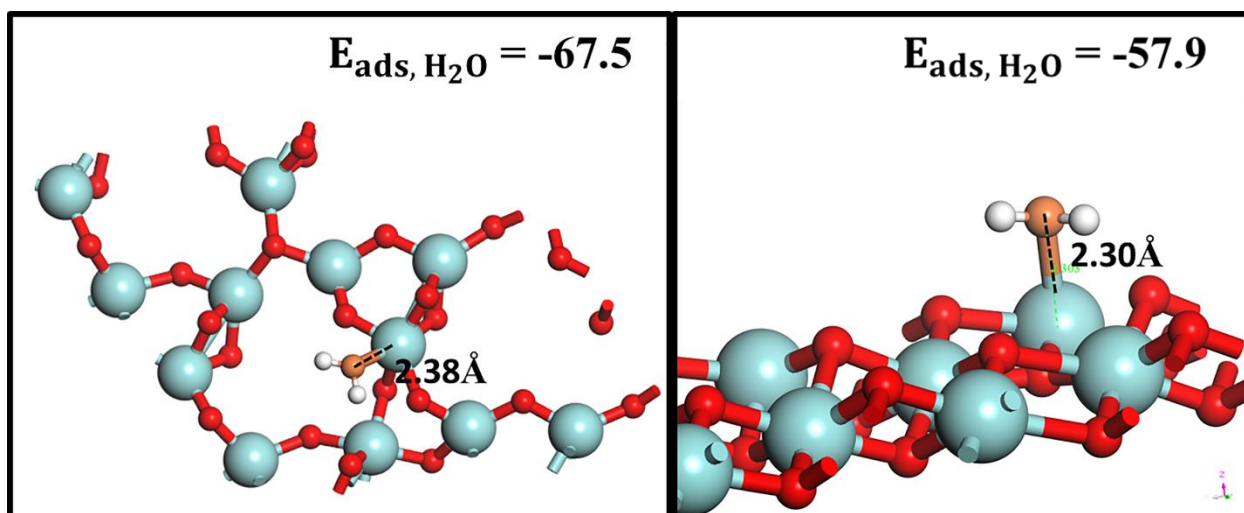

**Fig S21.** DFT calculated adsorption sites for H<sub>2</sub>O in m-ZrO<sub>2</sub> (left) and t-ZrO<sub>2</sub> (right). Adsorption energies ( $E_{\text{ads}}$ ) are in kJ mol<sup>-1</sup>. The atoms are shown as follows: Zr-green, H-white, O-red, C-gray, O in water-orange.

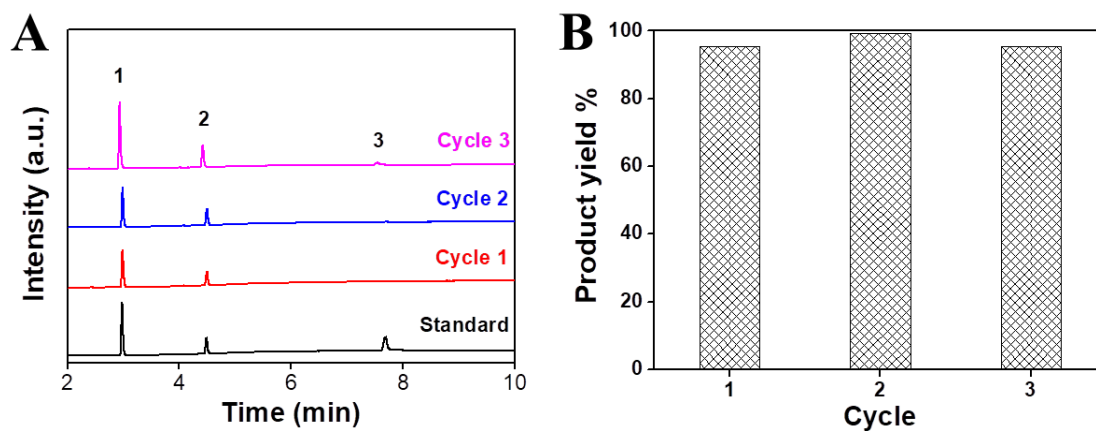

**Fig. S22** A) GC-FID chromatogram of obtained from the transesterification reaction of palmitic acid and methanol. B) Reutilization of ZrO<sub>2</sub>-NPC-800 of three transesterification reactions. Condition: The product was obtained after 24 h of reaction at 68 °C, using 18 wt.% of ZrO<sub>2</sub>-NPC-800°C as catalyst. 1= methyl palmitate, 2=methyl linoleate (internal standard) and 3=palmitate.

**Table S1.** SEM-EDS analysis of the MOG, carbonized MOG at different temperatures and cUiO-66

| Materials                 | Weight percent (%) |             |             |             |
|---------------------------|--------------------|-------------|-------------|-------------|
|                           | C                  | O           | Si          | Zr          |
| Zr-MOG                    | 53.7               | 16.8        | 12.7        | 16.8        |
| ZrO <sub>2</sub> -NPC-600 | 20.9               | 24.2        | 9.6         | 45.3        |
| ZrO <sub>2</sub> -NPC-700 | 29.4               | 25.7        | 6.7         | 38.2        |
| ZrO <sub>2</sub> -NPC-800 | 40.0               | 17.6        | 11.5        | 30.9        |
| <i>cUiO-66-800</i>        | <i>31.6</i>        | <i>18.9</i> | <i>11.3</i> | <i>38.2</i> |
| ZrO <sub>2</sub> -NPC-900 | 32.8               | 21.7        | 7.3         | 38.2        |

**Table S2.** Surface area and pore size distribution of Zr-MOG and ZrO<sub>2</sub>-NPCs at specified temperature

| Materials                              | Surface area (m <sup>2</sup> /g) <sup>a</sup> | Pore size (nm)   |
|----------------------------------------|-----------------------------------------------|------------------|
| Zr-MOG                                 | 690.3                                         | 1.37             |
| ZrO <sub>2</sub> -NPC-600 <sup>b</sup> | 193.6                                         | 0.6              |
| ZrO <sub>2</sub> -NPC-700 <sup>c</sup> | 330.8                                         | 1.1, 1.8-2.6     |
| ZrO <sub>2</sub> -NPC-800 <sup>d</sup> | 495.9                                         | 1.1, 2.1-3.7     |
| ZrO <sub>2</sub> -NPC-900 <sup>e</sup> | 341.7                                         | 0.8-1.4, 2.3-4.0 |

<sup>a</sup>Experimental data were calculated *via* BET method.

The carbonization temperatures were carried out at <sup>b</sup>600 °C, <sup>c</sup>700 °C, <sup>d</sup>800 °C, and <sup>e</sup>900 °C.

**Table S3.** LDI performance of ZrO<sub>2</sub>-NPCs for neurotransmitters<sup>a</sup>

| Matrices                  | S/N ratio (% RSD) <sup>b</sup> |          |          |
|---------------------------|--------------------------------|----------|----------|
|                           | Ne                             | Da       | E        |
| ZrO <sub>2</sub> -NPC-600 | 284 (16)                       | 1223 (9) | 921 (9)  |
| ZrO <sub>2</sub> -NPC-700 | 236 (12)                       | 923 (10) | 923 (10) |
| ZrO <sub>2</sub> -NPC-800 | 350 (9)                        | 1912 (7) | 1112 (8) |
| ZrO <sub>2</sub> -NPC-900 | 673 (5)                        | 1976 (3) | 1977 (2) |

<sup>a</sup>Detected at positive ion mode, <sup>b</sup>RSD = relative standard deviation (N=10)

**Table S4.** LDI performance of ZrO<sub>2</sub>-NPCs for neurotransmitters<sup>a</sup>

| Matrices                  | S/N ratio (% RSD) <sup>b</sup> |                 |                 |
|---------------------------|--------------------------------|-----------------|-----------------|
|                           | Ne                             | Da              | E               |
| ZrO <sub>2</sub> -NPC-600 | 1249 (8)                       | 1383 (6)        | 819 (5)         |
| ZrO <sub>2</sub> -NPC-700 | 1560 (6)                       | 1688 (11)       | 905 (9)         |
| ZrO <sub>2</sub> -NPC-800 | 3613 (5)                       | 3679 (5)        | 2363 (9)        |
| ZrO <sub>2</sub> -NPC-900 | 1190 (5)                       | 1614 (4)        | 745 (3)         |
| <i>cUiO-66-800</i>        | <i>296 (17)</i>                | <i>163 (15)</i> | <i>182 (20)</i> |

<sup>a</sup>Detected at negative ion mode, <sup>b</sup>RSD = relative standard deviation (N=10)

**Table S5.** LDI performance of MOG precursors and ZrO<sub>2</sub>-NPC-800

| Analytes | S/N ratio (RSD) <sup>a</sup> |                         |                             |             |
|----------|------------------------------|-------------------------|-----------------------------|-------------|
|          | ZrO <sub>2</sub> -NPC-800    | cZrCl <sub>4</sub> -800 | cZrCl <sub>4</sub> -BDC-800 | cUiO-66-800 |
| Ne       | 3613 (5)                     | n.d <sup>b</sup>        | 44 (11.3)                   | 296 (17)    |
| Da       | 3679 (5)                     | n.d <sup>b</sup>        | 46 (14.8)                   | 163 (15)    |
| E        | 2363 (9)                     | n.d <sup>b</sup>        | 32 (19.2)                   | 182 (20)    |

<sup>a</sup> Relative standard deviation, <sup>b</sup> not detected, N=10. Laser conditions: 30 %, 500 shots. N=10

**Table S6.** Analytical performance of other reported matrices applied for the LDI of neurotransmitters.

| Matrices                                                                | Analytes    | Detection limit | RSD <sup>a</sup> | Refs      |
|-------------------------------------------------------------------------|-------------|-----------------|------------------|-----------|
| [TiO <sub>2</sub> -Si-NH <sub>3</sub> <sup>+</sup> ][CHC <sup>-</sup> ] | dopamine    | - <sup>a</sup>  | - <sup>a</sup>   | S2        |
| porous silicon dioxide                                                  | dopamine    | 0.65 uM         | - <sup>a</sup>   | S3        |
| Hydroxyethyl Methacrylate-Functionalized Graphene Oxide                 | dopamine    | 0.13 uM         | - <sup>a</sup>   | S4        |
| 3-CF <sub>3</sub> -BTD <sup>b</sup>                                     | dopamine    | 3.27 uM         | - <sup>a</sup>   | S5        |
|                                                                         | epinephrine | 10 uM           |                  |           |
| DHPT <sup>c</sup>                                                       | dopamine    | > 10 uM         | > 2 %            | S6        |
| Carbon dots                                                             | dopamine    | 5 nM            | 9.4 %            | S7        |
| ZrO <sub>2</sub> -NPC-800 <sup>d</sup>                                  | dopamine    | 0.53 nM         | 5.0 %            | This work |

<sup>a</sup>Not reported, <sup>b</sup>5-(3-trifluoromethylbenzylidene)thiazolidine-2,4-dione, <sup>c</sup>2,3,4,5-Tetrakis(3',4'-dihydroxyphenyl)thiophene, <sup>d</sup>N=10.

**Table S7.** Analytical performance of the optimized ZrO<sub>2</sub>-NPC-800 for LDI process of neurotransmitters.

| Analytes | Limit of detection (LOD) <sup>a</sup> |                   |
|----------|---------------------------------------|-------------------|
|          | Positive ion mode                     | Negative ion mode |
| Ne       | 5.1 nM                                | 0.49 nM           |
| Da       | 1.0 nM                                | 0.53 nM           |
| E        | 1.5 nM                                | 0.69 nM           |

<sup>a</sup>Laser conditions: 30 %, 500 shots. N=10

**Table S8.** Transesterification of palmitic acid using ZrO<sub>2</sub>-NPC-800 as catalyst

| Reaction times | Conversion (%) |
|----------------|----------------|
| Cycle 1        | 95             |
| Cycle 2        | 99             |
| Cycle 3        | 95             |

Reaction conditions: The product was obtained after 24 h of reaction at 68 °C, using 18 wt.% of ZrO<sub>2</sub>-NPC-800 as catalyst.

## References:

- (1) L. Liu, J. Zhang, H. Fang, L. Chen and C. Y. Su, *Chemistry – An Asian Journal.*, 2016, **11**, 2278-2283.
- (2) H. Liu, J. Dai, J. Zhou, H. Huang, F. Chen and Z. Liu., *Int. J. Mass Spectrom.*, **2015**, 376, 85-89.
- (3) A. Kraj, J. Jarzebinska, A. Gorecka Drzazga, J. Dziuban and J. Silberring. *Rapid Commun. Mass Spectrom.*, **2006**, 20, 1969-1972.
- (4) X. Zheng, J. Zhang, H. Wei, H. Chen, Y. Tian and J. Zhang. *Anal. Lett.*, **2016**, 49, 1847-1861.
- (5) H. Kasai, M. Nakakoshi, T. Sugita, M. Matsuoka, Y. Yamazaki, Y. Unno, H. Nakajima, H. Fujiwake and M. Tsubuki, *Anal. Sci.*, **2016**, 32, 907-910.

- (6) S. Chen, L. Chen, J. Wang, J. Hou, Q. He, J. A. Liu, J. Wang, S. Xiong, G. Yang and Z. Nie, *Anal. Chem.*, **2012**, 84,10291-10297.
- (7) M. S. Khan, M. L. Bhaisare, S. Pandey, A. Talib, S. M. Wu, S. K. Kailasa and H. F. Wu, *Int. J. Mass Spectrom.*, **2015**, 393, 25-33.
